# Supplementary material for: Natural Products: A Potential Source of Malaria Transmission Blocking Drugs?
Source: Pharmaceuticals (Basel). 2020 Sep 17;13(9):251. doi: 10.3390/ph13090251 (PMC7558993; doi:10.3390/ph13090251)
Supplement: Supplementary file 1 [file pharmaceuticals-13-00251-s001.xlsx]

## Sheet:  All compounds
Compound Trivial Name	Structure	SMILE	Origin	Early Stage Gametocytes	Late Stage Gametocytes	Micro-Gametes	Macro-Gametes	Early Sporogonic Stages	Oocysts	Mosquitoes	References
Ionophores
Salinomycin		CCC(C1CCC(C(O1)C(C)C(C(C)C(=O)C(CC)C2C(CC(C3(O2)C=CC(C4(O3)CCC(O4)(C)C5CCC(C(O5)C)(CC)O)O)C)C)O)C)C(=O)O	Streptomyces sp.	IC50 = 0.014 µM (stages II/III) (P. falciparum gametocytes)	IC50 = 0.006 µM (stages IV/V) (P. falciparum gametocytes)			IC50 (ESS development)= 0.035 µM (P. berghei ESS)	IC50 (oocysts intensity) = 0.002 µM; IC50 (oocysts prevalence) = 0.018 µM (P. falciparum)		D'Alessandro et al. (2015) - http://dx.doi.org/10.1128/AAC.04332-14
Nigericin		CC1CCC(OC1C(C)C(=O)O)CC2CC(C(C3(O2)C(CC(O3)(C)C4CCC(O4)(C)C5C(CC(O5)C6C(CC(C(O6)(CO)O)C)C)C)C)C)OC	Streptomyces sp.	IC50 = 0.003 µM (stages II/III) (P. falciparum gametocytes)	IC50 = 0.001 µM (stages IV/V) (P. falciparum gametocytes)						D'Alessandro et al. (2015) - http://dx.doi.org/10.1128/AAC.04332-15
Monensin		CCC1(CCC(O1)C2(CCC3(O2)CC(C(C(O3)C(C)C(C(C)C(=O)O)OC)C)O)C)C4C(CC(O4)C5C(CC(C(O5)(CO)O)C)C)C	Streptomyces cinnamonensis	IC50 = 0.002 µM (stages II/III) (P. falciparum gametocytes)	IC50 = 0.006 µM (stages IV/V) (P. falciparum gametocytes)			IC50 (ESS development) = 0.017 µM (P. berghei ESS)	IC50 (oocysts intensity) = 0.002 µM; IC50 (oocysts prevalence) = 0.001 µM (P. falciparum)		D'Alessandro et al. (2015) - http://dx.doi.org/10.1128/AAC.04332-14
Maduramicin		CC1CC(C(OC1C2CC(C(O2)C3(CCC(O3)C4(CCC5(O4)CC(C(C(O5)C(C)C6C(C(C(C(O6)(CC(=O)O)O)C)OC)OC)C)O)C)C)OC7CC(C(C(O7)C)OC)OC)(C)O)C.N	Actinomadura rubra		IC50 = 0.047 µM (stages IV/V) (P. falciparum gametocytes); IC50 = 0.015 µM (stages III-V) (P. falciparum gametocytes)				P. berghei oocysts development blocked at 4 mg/kg and 8 mg/kg		Sun et al. (2014) - DOI: 10.1038/srep03743; Maron et al. (2016) - doi:10.1128/AAC.01928-15
Peptides, glycosides and miscellaneous
Epoxomicin		CCC(C)C(C(=O)NC(C(C)O)C(=O)NC(CC(C)C)C(=O)C1(CO1)C)NC(=O)C(C(C)CC)N(C)C(=O)C	Actinomycete sp.		IC50 = 0.0004 µM (stages IV/V) (P. falciparum gametocytes)	Inactive at 1 and 10 µM in blocking P. falciparum micro-gamete exflagellation	IC50 (macro-gametogenesis) = 0.008 µM (P. falciparum gametocytes)		P. falciparum oocysts development blocked at 0.1 µM		Lelievre et al. (2012) - doi:10.1371/journal.pone.0035019; Czesny et al.(2009) - doi:10.1128/AAC.00088-09; Bolscher et al. (2015) - doi:10.1093/jac/dkv003
Carmaphycin B		CCCCCC(=O)NC(C(C)C)C(=O)NC(CCS(=O)(=O)C)C(=O)NC(CC(C)C)C(=O)C(=C)C	Symploca sp.		IC50 = 0.160 µM (stage IV) (P. falciparum gametocytes)						LaMonte et al. (2017) - DOI: 10.1021/acs.jmedchem.7b00671
Carmaphycin B (derivative 18)		CCCCCC(NC(C(NC(C(NC(C(C1(C)CO1)=O)CC(C)C)=O)CCCC)=O)C(C)C)=O	Carmaphycin B derivative		IC50 = 0.130 µM (stage IV) (P. falciparum gametocytes)						LaMonte et al. (2017) - DOI: 10.1021/acs.jmedchem.7b00672
Thiostrepton		CCC(C)C1C(=O)NC(C(=O)NC(=C)C(=O)NC(C(=O)NC23CCC(=NC2C4=CSC(=N4)C(C(OC(=O)C5=NC6=C(C=CC(C6O)N1)C(=C5)C(C)O)C)NC(=O)C7=CSC(=N7)C(NC(=O)C8CSC(=N8)C(=CC)NC(=O)C(NC(=O)C9=CSC3=N9)C(C)O)C(C)(C(C)O)O)C1=NC(=CS1)C(=O)NC(=C)C(=O)NC(=C)C(=O)N)C)C	Streptomyces sp.	IC50 = 3.4 µM (stage I), 3.4 µM (stage II) and 2.8 µM (stage III) (P. falciparum gametocytes)	IC50 = 1.8 µM (stage IV) and 3.3 µM (stage V) (P. falciparum gametocytes)	IC50 (micro-gamete exflagellation) = 0.096 µM (P. falciparum gametocytes)	IC50 (macro-gamete activation) = 1.4 µM (P. falciparum gametocytes)	IC50 (ookinete formation) = 8 µM (P. berghei)	P. berghei oocysts development blocked at 50 µM		Plouffe et al. (2016) - http://dx.doi.org/10.1016/j.chom.2015.12.001; Delves et al. (2013) - DOI:10.1128/AAC.00325-13; Delves et al. (2012) - doi:10.1371/journal.pmed.1001169; Azevedo et al. (2017) - doi:10.1128/AAC.02699-16
Dactinomycin		CC1C(C(=O)NC(C(=O)N2CCCC2C(=O)N(CC(=O)N(C(C(=O)O1)C(C)C)C)C)C(C)C)NC(=O)C3=C4C(=C(C=C3)C)OC5=C(C(=O)C(=C(C5=N4)C(=O)NC6C(OC(=O)C(N(C(=O)CN(C(=O)C7CCCN7C(=O)C(NC6=O)C(C)C)C)C)C(C)C)C)N)C	Streptomyces parvullus		IC50 = 0.015 µM (stage III-IV) (P. falciparum gametocytes)						Sun et al. (2014) - DOI: 10.1038/srep03743
Romidepsin		CC=C1C(=O)NC(C(=O)OC2CC(=O)NC(C(=O)NC(CSSCCC=C2)C(=O)N1)C(C)C)C(C)C	Chromobacterium violaceum		IC50 = 0.637 µM (stage III-IV) (P. falciparum gametocytes)				P. falciparum oocysts development blocked at 0.4 µM		Sun et al. (2014) - DOI: 10.1038/srep03745; Saraiva et al. (2018) - DOI:10.1038/s41598-018-24296-0
Adriamycin		CC1C(C(CC(O1)OC2CC(CC3=C2C(=C4C(=C3O)C(=O)C5=C(C4=O)C(=CC=C5)OC)O)(C(=O)CO)O)N)O.Cl	Streptomyces sp.		IC50 = 0.526 µM (stage III-IV) (P. falciparum gametocytes)						Sun et al. (2014) - DOI: 10.1038/srep03744
Plicamycin		CC1C(C(CC(O1)OC2CC(OC(C2O)C)OC3=CC4=CC5=C(C(=O)C(C(C5)C(C(=O)C(C(C)O)O)OC)OC6CC(C(C(O6)C)O)OC7CC(C(C(O7)C)O)OC8CC(C(C(O8)C)O)(C)O)C(=C4C(=C3C)O)O)O)O	Streptomyces plicatus		IC50 = 0.833 µM (stage III-IV) (P. falciparum gametocytes)						Sun et al. (2014) - DOI: 10.1038/srep03746
Puromycin		CN(C)C1=NC=NC2=C1N=CN2C3C(C(C(O3)CO)NC(=O)C(CC4=CC=C(C=C4)OC)N)O	Streptomyces alboniger	IC50 = 0.123 µM (stage I), 0.122 µM (stage II) and 0.103 µM (stage III) (P. falciparum gametocytes)	IC50 = 0.110 µM (stage IV) and 0.122 µM (stage V) (P. falciparum gametocytes)		P. falciparum macro-gametogenesis blocked within 1 h at 5 µM				Plouffe et al. (2016) - http://dx.doi.org/10.1016/j.chom.2015.12.001; Bolscher et al. (2015) - doi:10.1093/jac/dkv003
Cycloheximide		CC1CC(C(=O)C(C1)C(CC2CC(=O)NC(=O)C2)O)C	Streptomyces griseus	IC50 = 1.9 µM (stage I), 0.6 µM (stage II) and 0.9 µM (stage III) (P. falciparum gametocytes)	IC50 = 0.477 µM (stage IV) and 2.7 µM (stage V) (P. falciparum gametocytes)		P. falciparum macro-gametogenesis blocked within 1 h at 5 µM	P. berghei ookinete development blocked at 10 µM			Plouffe et al. (2016) - http://dx.doi.org/10.1016/j.chom.2015.12.001; Bolscher et al. (2015) - doi:10.1093/jac/dkv004; Delves et al. (2012) - http://dx.doi.org/10.1016/j.ijpara.2012.08.009
Chlorotonil A		CC1C=CC=CC(OC(=O)C(C(=O)C(C(=O)C2C1C=CC3C2C(C=C(C3)C)C)(Cl)Cl)C)C	Sorangium cellulosum		IC50 = 0.030 µM and IC90 = 0.120 µM (stage IV/V) (P. falciparum gametocytes)						Held et al. (2014) - doi:10.1128/AAC.03326-14
Tetracycline		CC1(C2CC3C(C(=O)C(=C(C3(C(=O)C2=C(C4=C1C=CC=C4O)O)O)O)C(=O)N)N(C)C)O	Streptomyces aureofaciens	IC50 >12.5 µM (stages I, II and III) (P. falciparum gametocytes)	IC50 >12.5 µM (stages IV and V) (P. falciparum gametocytes)		Inactive in blocking P. falciparum macro-gametogenesis development at 5 µM		Inactive in blocking emergence of P. falciparum oocysts at 5 µM (Transmission reduction activity (TRA) = 28%)		Plouffe et al. (2016) - http://dx.doi.org/10.1016/j.chom.2015.12.001; Bolscher et al. (2015) - doi:10.1093/jac/dkv004; Vos et al. (2015) - DOI: 10.1038/srep18704
Fosmidomycin		C(CN(C=O)O)CP(=O)(O)O	Streptomyces lavendulae	IC50 >12.5 µM (stages I, II and III) (P. falciparum gametocytes)	IC50 >12.5 µM (stages IV and V) (P. falciparum gametocytes)		Inactive in blocking P. falciparum macro-gametogenesis development at 5 µM	Inactive in blocking P. berghei ookinete development at 10 µM	Inactive in blocking emergence of P. falciparum oocysts at 5 µM (TRA = 25%)		Plouffe et al. (2016) - http://dx.doi.org/10.1016/j.chom.2015.12.001; Bolscher et al. (2015) - doi:10.1093/jac/dkv004; Delves et al. (2012) - http://dx.doi.org/10.1016/j.ijpara.2012.08.010; Vos et al. (2015) - DOI: 10.1038/srep18704
Deferoxamine		CC(=O)N(CCCCCNC(=O)CCC(=O)N(CCCCCNC(=O)CCC(=O)N(CCCCCN)O)O)O	Streptomyces pilosus	IC50 >12.5 µM (stages I, II and III) (P. falciparum gametocytes)	IC50 >12.5 µM (stages IV and V) (P. falciparum gametocytes)		Inactive in blocking P. falciparum macro-gametogenesis development at 5 µM	Inactive in blocking P. berghei ookinete development at 10 µM	Inactive in blocking emergence of P. falciparum oocysts at 5 µM (TRA = 18%)		Plouffe et al. (2016) - http://dx.doi.org/10.1016/j.chom.2015.12.001; Bolscher et al. (2015) - doi:10.1093/jac/dkv004; Delves et al. (2012) - http://dx.doi.org/10.1016/j.ijpara.2012.08.011; Vos et al. (2015) - DOI: 10.1038/srep18704
BT37		CC1=C(O)C(C(C)=O)=C3C(C2(C)C(O3)=CC(/C(C2=O)=C(C)/NCS)=O)=C1O	Derivative of the natural compound usnic acid			Inactive at 250 µg/ml (642 µM) in blocking P. falciparum and P. berghei micro-gamete exflagellation		Impairs ookinete development in a dose dependent manner	Blocks P. falciparum oocysts development with estimated logistic regression to be between 97 to 142 µM		Pastrana-Mena et al. (2016) - DOI: 10.1021/acschembio.6b00902
BT122		CC1=C(O)C(C(C)=O)=C3C(C2(C)C(O3)=CC(/C(C2=O)=C(C)/NCSC(C)=O)=O)=C1O	Derivative of the natural compound usnic acid			Inactive at 250 µg/ml (580 µM) in blocking P. falciparum and P. berghei micro-gamete exflagellation		Impairs ookinete development in a dose dependent manner	Blocks P. falciparum oocysts development with estimated logistic regression to be between 35 to 234 µM		Pastrana-Mena et al. (2016) - DOI: 10.1021/acschembio.6b00903
Mycotoxins
P-orlandin		CC1=CC(=C(C2=C1C(=CC(=O)O2)OC)C3=C(C=C(C4=C3OC(=O)C=C4OC)C)O)O	Aspergillus niger						Reduced P. falciparum oocyts intensity and prevalence by 56.7% and 35.3%, respectively, at 8.6 µM		Niu et al. (2015) - DOI: 10.1038/srep14694
Aphidicolin		CC12CCC(C(C1CCC3C24CCC(C(C3)C4)(CO)O)(C)CO)O	Cephalosporium aphidicola			P. falciparum micro-gamete exflagellation inhibited significantly at 0.125 µM					Pastrana-Mena et al. (2016) - DOI: 10.1021/acschembio.6b00902
Cytochalasin-B		CC1CCCC(C=CC(=O)OC23C(C=CC1)C(C(=C)C(C2C(NC3=O)CC4=CC=CC=C4)C)O)O	Helminthosporium dematioideum					Incapable of blocking P. gallinaceum zygote-ookinete development at 25 µg/ml (52 µM)			Kumar et al. (1985) - https://doi.org/10.1016/0014-4894(85)90078-5
Terpenes and terpenoids
Artemisinin		CC1CCC2C(C(=O)OC3C24C1CCC(O3)(OO4)C)C	Artemisia annua	IC50 = 0.024 µM (stage I), 0.020 µM (stage II) and 0.012 µM (stage III) (P. falciparum gametocytes)	IC50 = 0.037 µM (stage IV) and >12.5 µM (stage V) (P. falciparum gametocytes)	IC50 (micro-gamete exflagellation) = 0.224 µM (P. falciparum gametocytes)	IC50 (macro-gamete activation) = 0.120 µM (P. falciparum gametocytes); IC50 (female-gamete activation) = >10 µM (P. falciparum gametocytes)	Inactive in blocking P. berghei ookinete development at 10 µM	P. falciparum oocysts development blocked at 5 µM (TRA = 93%)		Plouffe et al. (2016) - http://dx.doi.org/10.1016/j.chom.2015.12.001; Bolscher et al. (2015) - doi:10.1093/jac/dkv004; Delves et al. (2012) - http://dx.doi.org/10.1016/j.ijpara.2012.08.010; Vos et al. (2015) - DOI: 10.1038/srep18704
Parthenin		CC1CCC2C(C3(C1(C=CC3=O)O)C)OC(=O)C2=C	Parthenium hysterophorus			P. falciparum micro-gamete exflagellation significantly reduced at 0.1 µg/ml (0.38 µM)		P. berghei ookinete development blocked at 50 µg/ml (191 µM)	P. falciparum oocysts intensity inhibited to 100% and prevalence reduced to 0 at 0.1 µg/ml (0.38 µM)		Balaich et al. (2016) - doi:10.1128/AAC.02002-15
Parthenolide		CC1=CCCC2(C(O2)C3C(CC1)C(=C)C(=O)O3)C	Tanacetum parthenium			P. falciparum micro-gamete exflagellation significantly reduced at 0.1 µg/ml (0.402 µM)			P. falciparum oocysts intensity inhibited to 100% and prevalence reduced to 0 at 0.1 µg/ml (0.402 µM)		Balaich et al. (2016) - doi:10.1128/AAC.02002-16
1α,4α-dihydroxybishopsolicepolide		C=C2C[C@@H](C1[C@@H]([C@]([C@@](C=C[C@@](O)3C)2O)3[H])OC(C1=C)=O)OC(C)=O	Artemisia afra	IC50 = 17.5 µM (P. falciparum gametocyte stages II/III)	IC50 = 6.3 µM (P. falciparum gametocyte stages IV/V)						Moyo et al. (2019) - https://doi.org/10.1186/s12936-019-2694-1
Yomogiartemin		CC(=O)OC1CC(C23C(C4C1C(=C)C(=O)O4)C5(C(C2O3)O5)C)(C)O	Artemisia afra	IC50 = 13.1 µM (P. falciparum gametocyte stages II/III)	IC50 = 15.8 µM (P. falciparum gametocyte stages IV/V)						Moyo et al. (2019) - https://doi.org/10.1186/s12936-019-2694-2
Vernolide		CC(=C)C(=O)OC1CC23C(O2)CCC(=CC4C1C(=C)C(=O)O4)COC3O	Vernonia amygdalina					Weak activity with <33% inhibition of ESS development at 50 µM (P. berghei)			Abay et al. (2015) - DOI 10.1186/s12936-015-0812-2
Vernodalol		COC(=O)C(=C)C1C(CC2(COC(=O)C(=C)C2C1O)C=C)OC(=O)C(=C)CO	Vernonia amygdalina					IC50 (ESS development) = 18.7 µM (P. berghei)			Abay et al. (2015) - DOI 10.1186/s12936-015-0812-3
Daucovirgolide A		C[C@@]13C(O3)CC/C(C)=C/C(OC(/C(C)=C/C)=O)C([C@@](O)(C)C(O2)=O)C2C1	Daucus virgatus					Weak activity with <35% inhibition of ESS development at 50 µM (P. berghei)			Sirignano et al. (2017) - DOI: 10.1021/acs.jnatprod.7b00603; Sirignano et al. (2019) - https://doi.org/10.1016/j.fitote.2019.104188
Daucovirgolide B		C/[C@@]1=C\CC[C@@]3(C)C(O3)C(OC(/C(C)=C/C)=O)C([C@@](O)(C)C(O2)=O)C2C1	Daucus virgatus					Weak activity with <35% inhibition of ESS development at 50 µM (P. berghei)			Sirignano et al. (2017) - DOI: 10.1021/acs.jnatprod.7b00603; Sirignano et al. (2019) - https://doi.org/10.1016/j.fitote.2019.104189
Daucovirgolide C		O=C(O2)[C@](O)(C)C(C2C1)C(OC(/C(C)=C/C)=O)C(O3)[C@]3(C)CC[C@@H](OO)C1=C	Daucus virgatus					Weak activity with <35% inhibition of ESS development at 50 µM (P. berghei)			Sirignano et al. (2017) - DOI: 10.1021/acs.jnatprod.7b00603; Sirignano et al. (2019) - https://doi.org/10.1016/j.fitote.2019.104190
Daucovirgolide E		C[C@@]13C(O3)CC/C(C)=C/C(OC([C@]([C@@H]4C)(O4)C)=O)C([C@@](OC(/C(C)=C\C)=O)(C)C(O2)=O)C2C1	Daucus virgatus					Weak activity with <35% inhibition of ESS development at 50 µM (P. berghei)			Sirignano et al. (2017) - DOI: 10.1021/acs.jnatprod.7b00603; Sirignano et al. (2019) - https://doi.org/10.1016/j.fitote.2019.104191
Daucovirgolide F		O=C2[C@](OC(/C(C)=C\C)=O)(C)C1C(OC([C@]([C@@H]3C)(O3)C)=O)C4[C@@](C)(O4)CC/C=C(C)/CC1O2	Daucus virgatus					Weak activity with <35% inhibition of ESS development at 50 µM (P. berghei)			Sirignano et al. (2017) - DOI: 10.1021/acs.jnatprod.7b00603; Sirignano et al. (2019) - https://doi.org/10.1016/j.fitote.2019.104192
Daucovirgolide G		O=C2[C@](OC(/C(C)=C\C)=O)(C)C1C(OC([C@]([C@@H]3C)(O3)C)=O)/C=C(C)/CC/C=C(C)/CC1O2	Daucus virgatus					IC50 (ESS development) = 82.3 µM (P. berghei); IC50 (zygote to ookinete development) = 48.4 µM (P. berghei)			Sirignano et al. (2017) - DOI: 10.1021/acs.jnatprod.7b00603; Sirignano et al. (2019) - https://doi.org/10.1016/j.fitote.2019.104193
Daucovirgolide I		O=C2[C@](OC(/C(C)=C\C)=O)(C)C1C(OC([C@]([C@@H]3C)(O3)C)=O)C4[C@@](C)(O4)CCC(O5)[C@@](C)5CC1O2	Daucus virgatus					Weak activity with <5% inhibition of ESS development at 50 µM (P. berghei)			Sirignano et al. (2017) - DOI: 10.1021/acs.jnatprod.7b00603; Sirignano et al. (2019) - https://doi.org/10.1016/j.fitote.2019.104194
Daucovirgolide J		O=C(O2)[C@](OC(/C(C)=C\C)=O)(C)C(C2C1)C(OC([C@]([C@@H]3C)(O3)C)=O)C4C(O4)CC[C@H](OO)C1=C	Daucus virgatus					Weak activity with <5% inhibition of ESS development at 50 µM (P. berghei)			Sirignano et al. (2017) - DOI: 10.1021/acs.jnatprod.7b00603; Sirignano et al. (2019) - https://doi.org/10.1016/j.fitote.2019.104195
Daucovirgolide K		O=C(O2)[C@](O)(C)C(C2C1)C(OC(/[C@](C)=C/C)=O)/C=C(C)/CC[C@H](OO)C1=C	Daucus virgatus					Weak activity with <5% inhibition of ESS development at 50 µM (P. berghei)			Sirignano et al. (2017) - DOI: 10.1021/acs.jnatprod.7b00603; Sirignano et al. (2019) - https://doi.org/10.1016/j.fitote.2019.104196
Daucovirgolide L		O=C2[C@](O)(C)C1C(OC(/[C@](C)=C/C)=O)CC([C@@H](OO)CC[C@@](C)3C(O3)C1O2)=C	Daucus virgatus					Weak activity with <5% inhibition of ESS development at 50 µM (P. berghei)			Sirignano et al. (2017) - DOI: 10.1021/acs.jnatprod.7b00603; Sirignano et al. (2019) - https://doi.org/10.1016/j.fitote.2019.104197
Azadirachtin A		CC=C(C)C(=O)OC1CC(C2(COC3C2C14COC(C4C(C3O)(C)C56C7CC(C5(O6)C)C8(C=COC8O7)O)(C(=O)OC)O)C(=O)OC)OC(=O)C	Azadirachta indica			IC50 (micro-gamete exflagellation) = 3.5 µM (P. berghei gametocytes)		IC50 (ESS development) = 12.4 µg/ml (17.2 µM) (P. berghei)			Jones et al. (1994) - https://doi.org/10.1111/j.1574-6968.1994.tb07044.x; Dahiya et al. (2017) - http://dx.doi.org/10.1016/j.phymed.2016.10.019
Azadirachtin A-1		O=[C@]([C@@](OC[C@@]28[C@H](C[C@H]([C@@](CO[C@H]([C@H]78)[C@H]([C@]([C@@H]12)([C@]35O[C@](C)3[C@@H]6[C@]4(CCO[C@H]4O[C@H]5C6)O)C)O)7[C@](OC)=O)OC(C)=O)OC(/C(C)=C/C)=O)1O)OC	Azadirachtin A derivative			IC50 (micro-gamete exflagellation) = 2.3 µM (P. berghei gametocytes)					Jones et al. (1994) - https://doi.org/10.1111/j.1574-6968.1994.tb07044.x
Azadirachtin A-2		O=[C@]([C@@](OC[C@@]28[C@H](C[C@H]([C@@](CO[C@H]([C@H]78)[C@H]([C@]([C@@H]12)([C@]35O[C@](C)3[C@@H]6[C@]4(CCO[C@H]4O[C@H]5C6)O)C)O)7[C@](OC)=O)OC(C)=O)OC(C(C)CC)=O)1O)OC	Azadirachtin A derivative			IC50 (micro-gamete exflagellation) = 1.8 µM (P. berghei gametocytes)					Jones et al. (1994) - https://doi.org/10.1111/j.1574-6968.1994.tb07044.x
Azadirachtin A-3		O=[C@]([C@@](OC[C@@]28[C@H](C[C@H]([C@@](CO[C@H]([C@H]78)[C@H]([C@]([C@@H]12)([C@]35O[C@](C)3[C@@H]6[C@]4(CC(OC)O[C@H]4O[C@H]5C6)O)C)O)7[C@](OC)=O)OC(C)=O)OC(/C(C)=C/C)=O)1O)OC	Azadirachtin A derivative			IC50 (micro-gamete exflagellation) = 2.7 µM (P. berghei gametocytes)					Jones et al. (1994) - https://doi.org/10.1111/j.1574-6968.1994.tb07044.x
Azadirachtin B		CC=C(C)C(=O)OC1CC(C2(COC3C2C14COC(C4C(C3O)(C)C56C7CC(C5(O6)C)C8(C=COC8O7)O)(C(=O)OC)O)C(=O)OC)OC(=O)C	Azadirachta indica					Weak activity with 17% inhibition of ESS development at 50 µM (P. berghei)			Dahiya et al. (2017) - http://dx.doi.org/10.1016/j.phymed.2016.10.019
Azadirachtin D		CC=C(C)C(=O)OC1CC(C2(COC3C2C14COC(C4C(C3O)(C)C56C7CC(C5(O6)C)C8(C=COC8O7)O)(C(=O)OC)O)C)OC(=O)C	Azadirachta indica					Weak activity with 7.4% inhibition of ESS development at 50 µM (P. berghei)			Dahiya et al. (2017) - http://dx.doi.org/10.1016/j.phymed.2016.10.020
Azadirachtin I		CC=C(C)C(=O)OC1CC(C2(COC3C2C14COC(C4C(C3O)(C)C56C7CC(C5(O6)C)C8(C=COC8O7)O)O)C)OC(=O)C	Azadirachta indica					Weak activity with 21% inhibition of ESS development at 50 µM (P. berghei)			Dahiya et al. (2017) - http://dx.doi.org/10.1016/j.phymed.2016.10.021
Deacetylnimbin		CC1=C2C(CC1C3=COC=C3)OC4C2(C(C5(C(C4O)C(C=CC5=O)(C)C(=O)OC)C)CC(=O)OC)C	Azadirachta indica					IC50 ESS formation = range between 6 to 25 µM (P. berghei)			Tapanelli et al. (2016) - http://dx.doi.org/10.1016/j.fitote.2016.09.008
Nimbin		CC1=C2C(CC1C3=COC=C3)OC4C2(C(C5(C(C4OC(=O)C)C(C=CC5=O)(C)C(=O)OC)C)CC(=O)OC)C	Azadirachta indica					Weak activity with 40% inhibition of ESS development at 50 µg/ml (92.5 µM) (P. berghei)			Tapanelli et al. (2016) - http://dx.doi.org/10.1016/j.fitote.2016.09.009
Salannin		CC=C(C)C(=O)OC1CC(C2(COC3C2C1(C(C4(C3OC5C4=C(C(C5)C6=COC=C6)C)C)CC(=O)OC)C)C)OC(=O)C	Azadirachta indica					Poor activity with 0% inhibition of ESS development at 50 µg/ml (83.8 µM) (P. berghei)			Tapanelli et al. (2016) - http://dx.doi.org/10.1016/j.fitote.2016.09.010
Gedunin		CC(=O)OC1CC2C(C(=O)C=CC2(C3C1(C45C(O4)C(=O)OC(C5(CC3)C)C6=COC=C6)C)C)(C)C	Azadirachta indica						Inferred to block development of oocyts		Yerbanga et al. (2014) - doi:10.1186/1756-3305-7-185
Azadirone		CC(=O)OC1CC2C(C(=O)C=CC2(C3C1(C4=CCC(C4(CC3)C)C5=COC=C5)C)C)(C)C	Azadirachta indica						Inferred not to block development of oocyts		Yerbanga et al. (2014) - doi:10.1186/1756-3305-7-186
Azadiradione		CC(=O)OC1CC2C(C(=O)C=CC2(C3C1(C4=CC(=O)C(C4(CC3)C)C5=COC=C5)C)C)(C)C	Azadirachta indica						Inferred not to block development of oocyts		Yerbanga et al. (2014) - doi:10.1186/1756-3305-7-187
Taxol		CC1=C2C(C(=O)C3(C(CC4C(C3C(C(C2(C)C)(CC1OC(=O)C(C(C5=CC=CC=C5)NC(=O)C6=CC=CC=C6)O)O)OC(=O)C7=CC=CC=C7)(CO4)OC(=O)C)O)C)OC(=O)C	Taxus brevifolia					Approximatetly 80% inhibition of P. gallinaceurn zygote to ookinete development at 5 µM			Kumar et al. (1985) - https://doi.org/10.1016/0014-4894(85)90078-5
Alkaloids, steroids and miscellaneous
Quinine		COC1=CC2=C(C=CN=C2C=C1)C(C3CC4CCN3CC4C=C)O	Cinchona sp.	IC50 = 0.44 µM (stage I), 0.496 µM (stage II) and >8.775 µM (stage III) (P. falciparum gametocytes); IC50 = 2.1 (stage I-III) (P. falciparum gametocytes)	IC50 = >12.5 µM (stage IV) and >8.865 µM (stage V) (P. falciparum gametocytes); IC50 = 0.318 µM (stage IV/V) (P. falciparum gametocytes)		Weakly blocks macro-gamete development with 29% inhibition at 5 µM (P. falciparum)	Weakly blocks gamete-to-ookinetes development with 22.6% inhibition at 10 µM (P. berghei)	Blocks emergence of P. falciparum oocysts at 5 µM (TRA = 85%)		Plouffe et al. (2016) - http://dx.doi.org/10.1016/j.chom.2015.12.001; Duffy and Avery (2013) - doi:10.1186/1475-2875-12-408; Bolscher et al. (2015) - doi:10.1093/jac/dkv004; Delves et al. (2012) - http://dx.doi.org/10.1016/j.ijpara.2012.08.010; Vos et al. (2015) - DOI: 10.1038/srep18704
Dihydronitidine		CN1CC2=CC(=C(C=C2C3=C1C4=CC5=C(C=C4C=C3)OCO5)OC)OC	Zanthoxylum heitzii					IC50 (ookinete formation) = 0.59 µg/ml (1.7 µM) (P. berghei)			Goodman et al. (2016) - DOI 10.1186/s12936-016-1533-x
Heitziquinone		CN(C(C2=CC4=C(OCO4)C=C2C=C3)=C3C1=CC(C(OC)=CC1=O)=O)O[CH]	Zanthoxylum heitzii					IC50 (ookinete formation) = 6.2 µg/ml (17 µM) (P. berghei)			Goodman et al. (2016) - DOI 10.1186/s12936-016-1533-x
Pellitorine		CCCCCC=CC=CC(=O)NCC(C)C	Zanthoxylum heitzii					IC50 (ookinete formation) = >20 µg/ml (>20 µM) (P. berghei)			Goodman et al. (2016) - DOI 10.1186/s12936-016-1533-x
Tryptanthrin		C1=CC=C2C(=C1)C(=O)N3C4=CC=CC=C4C(=O)C3=N2	Isatis tinctoria	Inhibits development of stage II to stage IV/V P. falciparum gametocytes by ca. 95% at a concentration eqaul to the IC90 value against asexual stages		Inactive, at concentration eqaul to the IC90 value against aexual stages, in blocking exflagellation of P. falciparum micro-gametes					Onambele et al. (2015) - http://dx.doi.org/10.1016/j.ijpddr.2015.03.002
NT1		O=C(N2C3=CC=C([N+]([O-])=O)C=C34)C1=CC=C(Cl)C=C1N=C2C4=O	Tryptanthrin derivative	Inhibits development of stage II to stage IV/V P. falciparum gametocytes by 100% at a concentration eqaul to the IC90 value against asexual stages		Weakly inhibits P. falciparum micro-gamete exflagellation by 20% at concentration eqaul to the IC90 value against aexual stages					Onambele et al. (2015) - http://dx.doi.org/10.1016/j.ijpddr.2015.03.003
T8		O=C(N2C3=CC=CC=C34)C1=CC=C(Cl)C=C1N=C2C4=O	Tryptanthrin derivative	Inhibits development of stage II to stage IV/V P. falciparum gametocytes by 100% at a concentration eqaul to the IC90 value against asexual stages		Inactive, at concentration eqaul to the IC90 value against aexual stages, in blocking exflagellation of P. falciparum micro-gametes					Onambele et al. (2015) - http://dx.doi.org/10.1016/j.ijpddr.2015.03.004
Cryptolepine		CN1C2=CC=CC=C2C=C3C1=C4C=CC=CC4=N3	Cryptolepis sanguinolenta		Reported to "show minimum inhibitory" effect on late stage P. falciparum gametocytes						Forkuo et al. (2016) - DOI: 10.1055/s-0036-1596329
Omacetaxine		CC(C)(CCCC(CC(=O)OC)(C(=O)OC1C2C3=CC4=C(C=C3CCN5C2(CCC5)C=C1OC)OCO4)O)O	Cephalotaxus harringtonia		IC50 = 0.083 µM (P. falciparum gametocyte stages IV/V)						Sun et al. (2014) - DOI: 10.1038/srep03744
Securinine		C1CCN2C(C1)C34CC2C=CC3=CC(=O)O4	Securinegasp.		IC50 = 36.7 µM (P. falciparum gametocytes stage V)						Vu et al. (2014) - dx.doi.org/10.1021/cb400582b
Virosecurinine		C1CCN2C(C1)C34CC2C=CC3=CC(=O)O4	Fragment of securinine		IC50 = 29.7 µM (P. falciparum gametocytes stage V)						Vu et al. (2014) - dx.doi.org/10.1021/cb400582b
Allosecurinine		C1CCN2C(C1)C34CC2C=CC3=CC(=O)O4	Fragment of securinine		IC50 = 23.6 µM (P. falciparum gametocytes stage V)						Vu et al. (2014) - dx.doi.org/10.1021/cb400582b
Viroallosecurinine		C1CCN2C(C1)C34CC2C=CC3=CC(=O)O4	Fragment of securinine		IC50 = 81.1 µM (P. falciparum gametocytes stage V)						Vu et al. (2014) - dx.doi.org/10.1021/cb400582b
Colchicine		CC(=O)NC1CCC2=CC(=C(C(=C2C3=CC=C(C(=O)C=C13)OC)OC)OC)OC	Colchicum autumnale					Approximatetly 80% inhibition of P. gallinaceurn zygote to ookinete development at 30 µM			Kumar et al. (1985) - https://doi.org/10.1016/0014-4894(85)90078-6
Withaferin A		CC1=C(C(=O)OC(C1)C(C)C2CCC3C2(CCC4C3CC5C6(C4(C(=O)C=CC6O)C)O5)C)CO	Withania somnifera		IC50 = 0.372 µM (P. falciparum gametocyte stages IV/V)						Sun et al. (2014) - DOI: 10.1038/srep03745
SN-1		C[C@@H](C(CC[C@H](C)CO)=O)[C@H]4C(OC(C)=O)CC3C2CCC1=CC(CCC(C)1C2CCC34C)=O	Solanum nudum						Significantly reduced P. vivax oocysts prevalence but had no effect on intensity		Arango et al. (2006) - DOI: 10.1002/ptr.1874
SN-2		C[C@@H](C(CC[C@H](C)CO)=O)[C@H]4C(O)CC3C2CCC1=CC(CCC(C)1C2CCC34C)=O	Solanum nudum						Significantly reduced both P. vivax oocysts intensity and prevalence		Arango et al. (2006) - DOI: 10.1002/ptr.1875
SN-4		CC12C(CCC3C2CCC4(C)C3CC5C4C(C)C(CC[C@@H](C)COC6OC(CO)C(C)C(C)C6C)(O)O5)=CC(CC1)=O	Solanum nudum						Did not significantly reduce either P. vivax oocysts intensity or prevalence		Arango et al. (2006) - DOI: 10.1002/ptr.1876
1o		OC(C=C(C=CC=C6)C6=C5)=C5CNC1CCC2C(C)1CCC4C2CCC3=CC(OC)=CC=C34	Sarachine derivative	Early and mid P. falciparum gametocyte stages viability reduced to <50% at >5 nM	Late P. falciparum gametocyte stages viability reduced to <50% at >5 nM				Oocysts intensity and density significantly reduced in a dose dependent manner		Krieg et al. (2017) - doi: 10.1038/ncomms14478
Lophirone A		C1=CC(=CC=C1C(C2=CC=C(C=C2)O)C(C3=COC4=C(C3=O)C=CC(=C4)O)C(=O)C5=C(C=C(C=C5)O)O)O	Lophira lanceolate		IC50 = 49.4 µM (P. falciparum gametocytes stage V)						Lopatriello et al. (2019) - https://doi.org/10.1016/j.bioorg.2019.103321
Lophirone F		C1=CC(=CC=C1C2C(C(C(O2)C3=CC=C(C=C3)O)C(=O)C4=C(C=C(C=C4)O)O)C(=O)C5=C(C=C(C=C5)O)O)O	Lophira lanceolate		IC50 = 52.9 µM (P. falciparum gametocytes stage V)						Lopatriello et al. (2019) - https://doi.org/10.1016/j.bioorg.2019.103322
Lophirone E		C1=CC(=CC=C1C2=CC3=C(O2)C=CC(=C3)C=CC(=O)C4=C(C=C(C=C4)O)O)O	Lophira lanceolate		IC50 = 0.14 µM (P. falciparum gametocytes stage V)						Lopatriello et al. (2019) - https://doi.org/10.1016/j.bioorg.2019.103323
Lophirone D		C1=CC(=CC=C1C2=C(C3=C(O2)C=CC(=C3)C=CC(=O)C4=C(C=C(C=C4)O)O)C=O)O	Lophira lanceolate		IC50 >100 µM (P. falciparum gametocytes stage V)						Lopatriello et al. (2019) - https://doi.org/10.1016/j.bioorg.2019.103324
Lophirone C		O=C(C4=C(O)C=C(O)C=C4)/C=C/C3=CC1=C(C=C3)O[C@@]([C@]2=CC=C(O)C=C2)=[C@@]1[C@](C5=CC=C(O)C=C5O)=O	Lophira lanceolate		IC50 = 8.07 µM (P. falciparum gametocytes stage V)						Lopatriello et al. (2019) - https://doi.org/10.1016/j.bioorg.2019.103325
Compound 5 (α′-chlorolophirone E)		O=C(C4=C(O)C=C(O)C=C4)/C=C/C3=CC1=C(C=C3)OC(C2=CC=C(O)C=C2)=C1Cl	Lophira lanceolate		IC50 = 4.11 µM (P. falciparum gametocytes stage V)						Lopatriello et al. (2019) - https://doi.org/10.1016/j.bioorg.2019.103326
Compound 6 (5′-chlorolophirone D)		O=C(C4=C(O)C=C(O)C(Cl)=C4)/C=C/C3=CC1=C(C=C3)OC(C2=CC=C(O)C=C2)=C1	Lophira lanceolate		IC50 = 81.4 µM (P. falciparum gametocytes stage V)						Lopatriello et al. (2019) - https://doi.org/10.1016/j.bioorg.2019.103327
Glucolophirone C		OC(C=C4)=CC=C4C(O3)C(C(C5=C(OC6OC(CO)C(O)C(O)C6O)C=C(O)C=C5)=O)C1=C3C=CC(/C=C/C(C2=C(O)C=C(O)C=C2)=O)=C1	Lophira lanceolate					IC50 (ookinete development) = 79.4 µM; IC50 (ESS development) = 90.2 µM (P. berghei ESS)			Sore et al. (2020) - https://doi.org/10.1016/j.phytochem.2020.112336
Lanceolin A		C1C(C(C(C(=CC#N)C1OC2C(C(C(C(O2)CO)O)O)O)OC(=O)C3=CC=CC=C3)O)O	Lophira lanceolate					IC50 (ookinete development) = 91.2 µM; IC50 (ESS development) = 113.6 µM (P. berghei ESS)			Sore et al. (2020) - https://doi.org/10.1016/j.phytochem.2020.112337
Lanceolin B		C1C(C(C(C(=CC#N)C1OC2C(C(C(C(O2)CO)O)O)O)O)O)OC(=O)C3=CC=CC=C3	Lophira lanceolate					IC50 (ookinete development) = 10.95 µM; IC50 (ESS development) = 12.75 µM (P. berghei ESS)			Sore et al. (2020) - https://doi.org/10.1016/j.phytochem.2020.112338
Riboflavin		CC1=CC2=C(C=C1C)N(C3=NC(=O)NC(=O)C3=N2)CC(C(C(CO)O)O)O	Numerous leafy vegetables	IC50 >12.5 µM (stages I, II and III) (P. falciparum gametocytes)	IC50 >12.5 µM (stages IV and V) (P. falciparum gametocytes)	15.3% inhibition of P. falciparum micro-gamete exflagellation at 1 µM	2% inhibition of P. falciparum macro-gamete activation at 1 µM		Inactive in blocking emergence of P. falciparum oocysts at 5 µM (TRA = 27%)		Plouffe et al. (2016) - http://dx.doi.org/10.1016/j.chom.2015.12.001; Delves et al. (2013) - DOI: 10.1128/AAC.00325-13; Vos et al. (2015) - DOI: 10.1038/srep18704
Atovaquone		C1CC(CCC1C2=CC=C(C=C2)Cl)C3=C(C4=CC=CC=C4C(=O)C3=O)O	Derivative of the plant derived natural compound	IC50 >12.5 µM (stages I, II and III) (P. falciparum gametocytes)	IC50 = 2.373 µM (stage IV) and >12.5 µM (stage V) (P. falciparum gametocytes)	12.02% inhibition of P. falciparum micro-gamete exflagellation at 1 µM	12.31% inhibition of P. falciparum macro-gamete activation at 1 µM	IC50 (ookinete development) = 0.065 µM (P. berghei ESS)	Blocks emergence of P. falciparum oocysts at 5 µM (TRA = 100%); IC50 (oocysts intensity) = 0.002 µM		Plouffe et al. (2016) - http://dx.doi.org/10.1016/j.chom.2015.12.001; Delves et al. (2013) - DOI: 10.1128/AAC.00325-13; Delves et al. (2012) - http://dx.doi.org/10.1016/j.ijpara.2012.08.010; Vos et al. (2015) - DOI: 10.1038/srep18704
Ivermectin		CCC(C)C1C(CCC2(O1)CC3CC(O2)CC=C(C(C(C=CC=C4COC5C4(C(C=C(C5O)C)C(=O)O3)O)C)OC6CC(C(C(O6)C)OC7CC(C(C(O7)C)O)OC)OC)C)C	Derivative of avermectins, a class of compounds produced by Streptomyces avermitilis		IC50 = 0.5 µM (stages IV/V) (P. falciparum gametocytes)				Ivermectin significantly reduced oocysts prevalence of A. gambiae and not intensity	Increase mortality of A. gambiae and A. funestus by four- to seven-fold in human clinical studies.	de Carvalho et al. (2019) - DOI: 10.1128/AAC.00085-19; Kobylinski et al. (2012) - doi:10.1186/1475-2875-11-381; Ouédraogo et al. (2014) - DOI: 10.1093/cid/ciu797
Eprinomectin		CC1C=CC=C2COC3C2(C(C=C(C3O)C)C(=O)OC4CC(CC=C(C1OC5CC(C(C(O5)C)OC6CC(C(C(O6)C)NC(=O)C)OC)OC)C)OC7(C4)C=CC(C(O7)C(C)C)C)O	Derivative of avermectins, a class of compounds produced by Streptomyces avermitilis							Significantly reduced survival of A. arabiensis mosquito which collected a blood meal from cattle orally dosed with dosed with eprinomectin	Poché et al. (2015) - DOI 10.1186/s12936-015-0883-0
3-carboxy-4-methoxy-N-methyl-2-pyridone		CN1C=CC(=C(C1=O)C(=O)O)OC	Ricinus communis							Reduced mean survival of Anopheles gambiae to 4.93 days at 0.04 mg/ml	Wachira et al. (2014) - doi:10.1186/1756-3305-7-312
Ricinine		CN1C=CC(=C(C1=O)C#N)OC	Ricinus communis							Reduced mean survival of A. gambiae to 4.85 days at 0.04 mg/ml	Wachira et al. (2014) - doi:10.1186/1756-3305-7-313
KAE609		CC1CC2=C(C3(N1)C4=C(C=CC(=C4)Cl)NC3=O)NC5=CC(=C(C=C25)F)Cl	Derivative of a natural compound	Development of stage II P. falciparum gametocytes significantly inhibited at 0.05 and 0.5 µM	Development of stage V P. falciparum gametocytes significantly inhibited at 0.5 µM				Blocks oocysts development at 0.5µM		van Pelt-Koops et al. (2014) - doi:10.1128/AAC.06377-11
OZ439		C1CC2(CCC1C3=CC=C(C=C3)OCCN4CCOCC4)OC5(C6CC7CC(C6)CC5C7)OO2	Development inspired by artemisinin	IC50 = 0.011 µM (stage I), 0.005 µM (stage II) and 0.003 µM (stage III) (P. falciparum gametocytes)	IC50 = 0.002 µM (stage IV) and >12.5 µM (stage V) (P. falciparum gametocytes)	>65% inhibition of P. berghei micro-gamete exflagellation at 10 µM	IC50 (macro-gamete activation) = 0.15 µM (P. falciparum gametocytes)		Blocks emergence of P. falciparum oocysts at 5 µM (TRA = 99%)		Plouffe et al. (2016) - http://dx.doi.org/10.1016/j.chom.2015.12.001; Delves et al. (2012) - doi:10.1371/journal.pmed.1001169; Bolscher et al. (2015) - doi:10.1093/jac/dkv004; Vos et al. (2015) - DOI: 10.1038/srep18704
